# Supplementary material for: FeCl3 mediated intramolecular olefin-cation cyclization of cinnamates for the synthesis of highly substituted indenes
Source: Royal Society of Chemistry journal article supplement (doi:10.1039/c3cc43159b), 2013-01-01

### Deuterium Experiment:

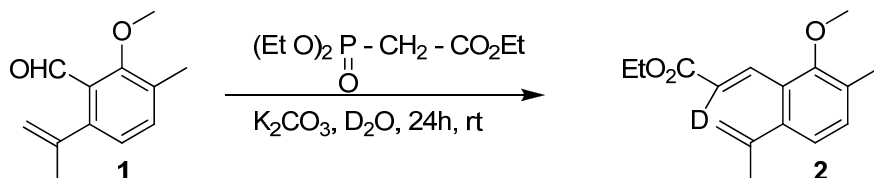

**Compound 2:** Dry potassium carbonate (431 mg, 3.12 mmoles), deuterium oxide (2 ml) and triethylphosphonoacetate (0.265 mg, 1.18 mmoles) are stirred vigorously

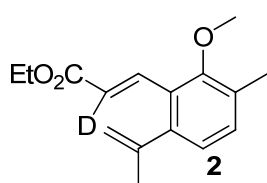

in a dry flask for 20 hours at room temperature under nitrogen atmosphere<sup>1</sup>. Aldehyde (150 mg, 0.78 mmoles) is then introduced and stirring is continued for 24 hours. Extraction (diethylether, 10ml x 3) is

performed after addition of water (5 ml), and the combined organic layers were washed with brine and dried over anhydrous Na<sub>2</sub>SO<sub>4</sub>. The solvent was removed under reduced pressure. The crude product was purified on silica gel column chromatography using EtOAc-hexane as eluent to furnish the product (185 mg, 91%) as a yellow solid. *R<sub>f</sub>* = 0.51 (EtOAc-hexane 3:97); **IR** (neat):  $\nu_{\text{max}}/\text{cm}^{-1}$  1713, 1619, 1593, 1476, 1218; **<sup>1</sup>H NMR** (500 MHz, CDCl<sub>3</sub>)  $\delta$  1.33 (t, *J* = 7.3 Hz, 3H), 2.01 (s, 3H), 2.29 (s, 3H), 3.67 (s, 3H), 4.25 (q, *J* = 7.3 Hz, 2H), 4.90 (br s, 1H), 5.24 (br s, 1H), 6.88 (d, *J* = 7.9 Hz, 1H), 7.12 (d, *J* = 7.9 Hz, 1H), 7.82 (s, 1H); **<sup>13</sup>C NMR** (125 MHz, CDCl<sub>3</sub>)  $\delta$  14.3, 15.9, 24.6, 59.8, 60.3, 116.7, 122.0(q), 124.3, 125.0, 130.4, 132.0, 139.8, 144.5, 144.8, 157.8, 167.7; **HRMS:** *m/z* calcd for C<sub>16</sub>H<sub>19</sub>DNaO<sub>3</sub> [(M+Na)<sup>+</sup>]: 284.1373; Found: 284.1373.

---

1. Pascale Segueineau, Jean Villieras, *Tetrahedron Letters.*, 1988, **29**, 477

### Cyclization reaction on deuterated diene ester

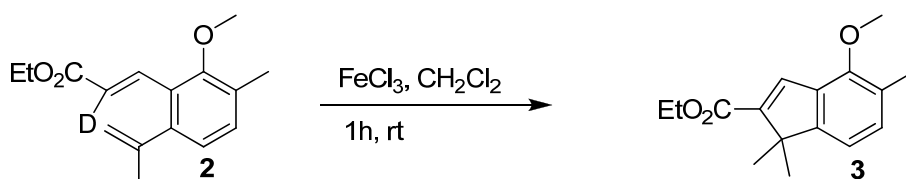

**Compound 3:** Under inert atmosphere of argon, to a stirred solution of diene ester (50 mg, 0.19

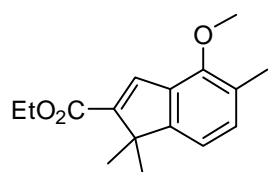

mmol) in CH<sub>2</sub>Cl<sub>2</sub> (50ml) and FeCl<sub>3</sub> (62 mg, 0.38 mmol) was added at 0°C and stirred for 1h at RT. The reaction progress was monitored by TLC and after completion the reaction was quenched by sodium bisulphate.

The reaction mixture was extracted with CH<sub>2</sub>Cl<sub>2</sub> and the combined organic layers were washed with brine and dried over anhydrous Na<sub>2</sub>SO<sub>4</sub>. The solvent was removed under reduced pressure. The crude product was purified on silica gel column chromatography using EtOAc-hexane as an eluent to furnish the cyclised product (46 mg, 93%) as a yellow solid. *R<sub>f</sub>* = 0.51 (EtOAc-hexane 3:97); **IR** (neat):  $\nu_{\text{max}}/\text{cm}^{-1}$  2979, 2928, 1704, 1568, 1478, 1419, 1244; **<sup>1</sup>H NMR** (200 MHz, CDCl<sub>3</sub>)  $\delta$  1.38 (t, *J* = 7.0 Hz, 3H), 1.44 (s, 6H), 2.29 (s, 3H), 3.94 (s, 3H), 4.3 (q, *J* = 7 Hz, 2H), 7.00 (d, *J* = 7.4 Hz, 1H), 7.17 (d, *J* = 7.4 Hz, 1H), 7.79 (s, 1H); **<sup>13</sup>C NMR** (100 MHz, CDCl<sub>3</sub>)  $\delta$  14.4, 15.8, 24.2, 49.8, 60.0, 61.5, 116.7, 128.5, 130.5, 131.3, 136.0, 145.0, 153.8, 157.0, 164.4; **HRMS** (C<sub>16</sub>H<sub>21</sub>O<sub>3</sub>): Calc'd 261.1491 [(M+H)<sup>+</sup>], Found 261.1495.

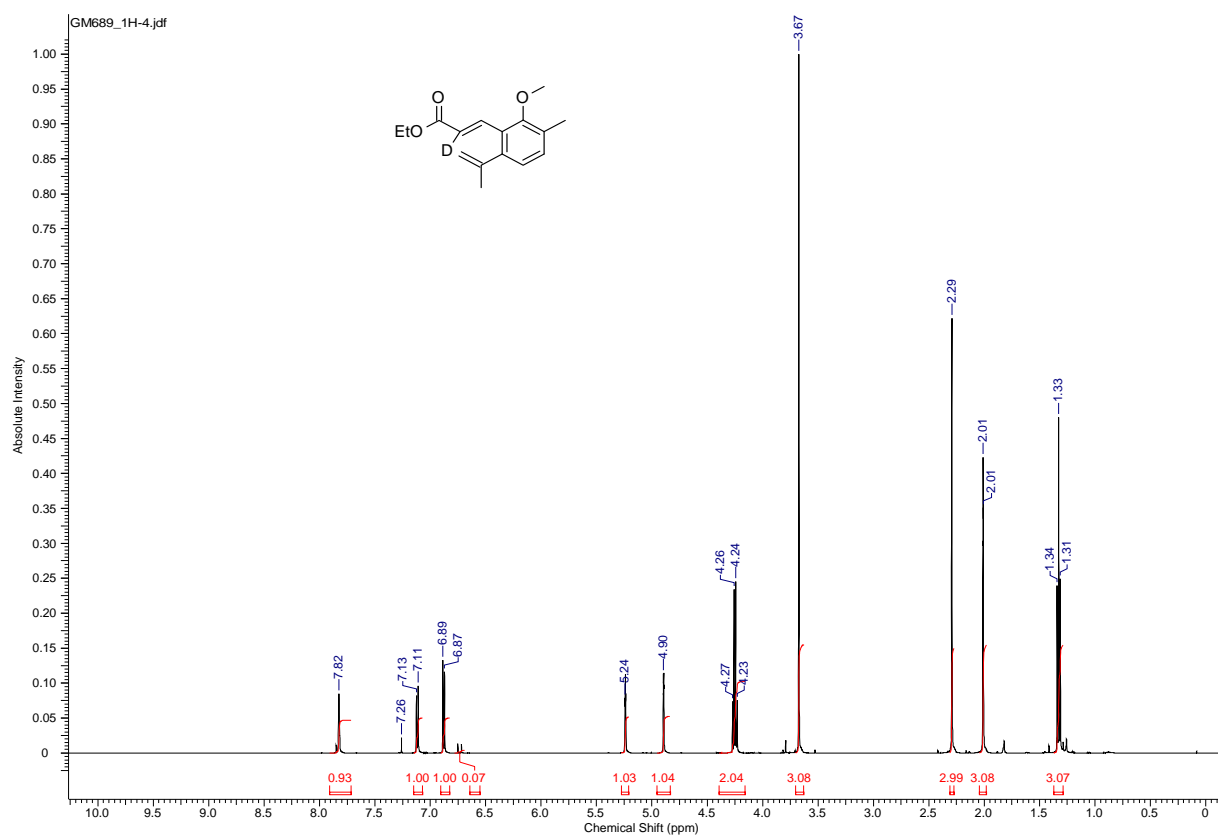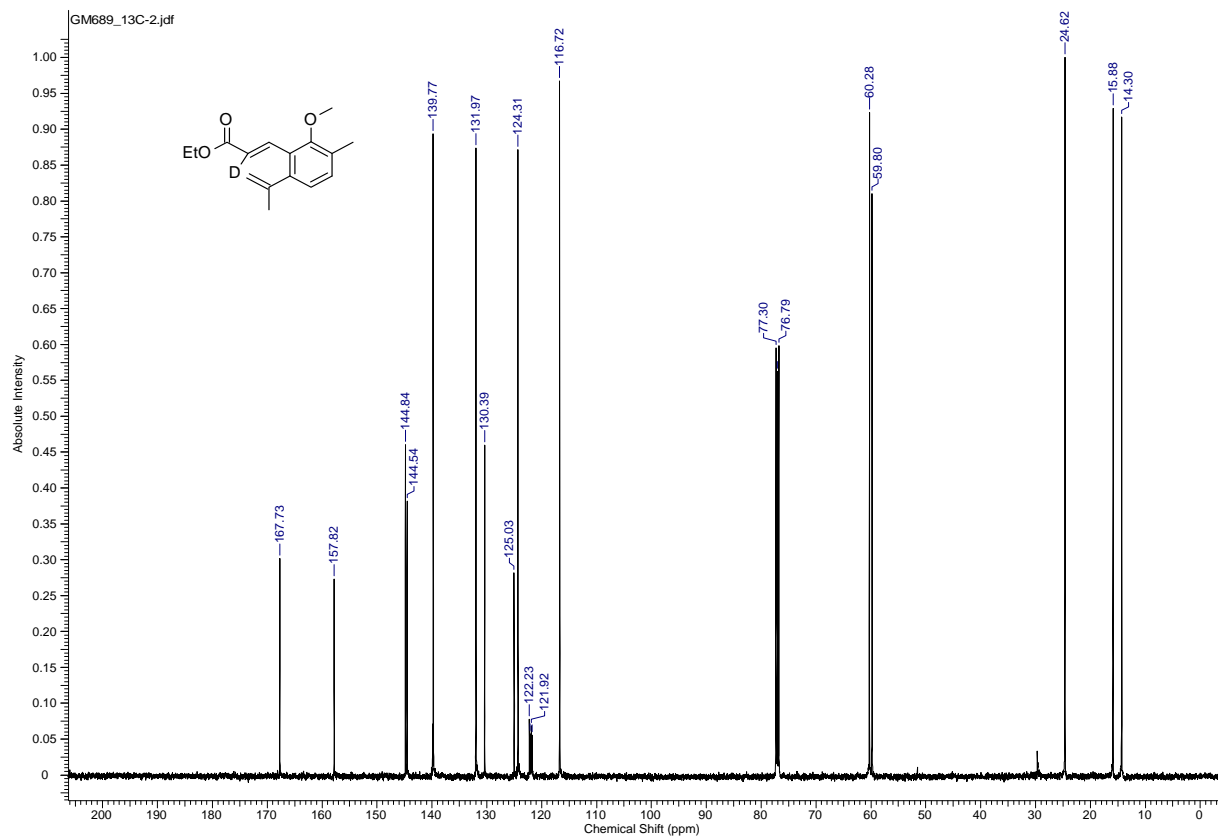

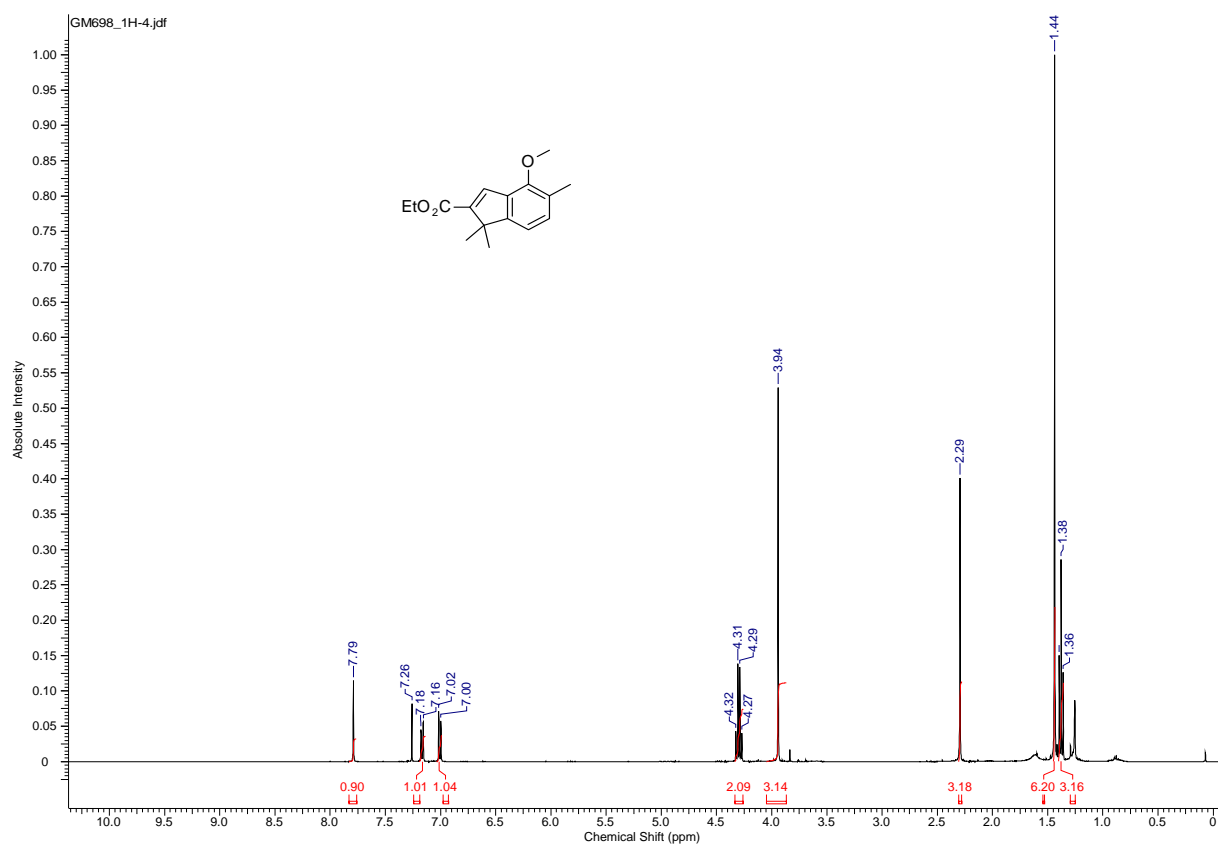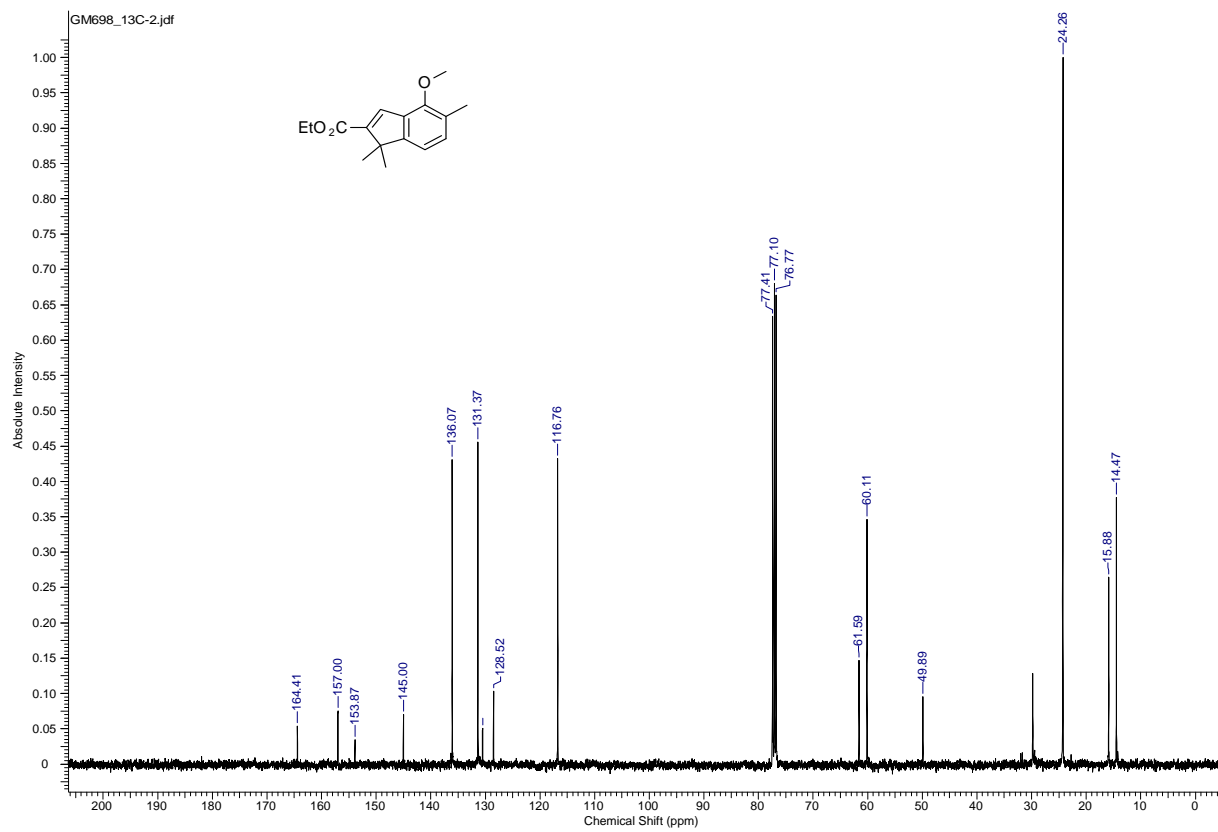

Supplement: c3cc43159b.pdf [file c3cc43159b.pdf]
